# Supplementary material for: Who pays for home care? A study of nationally representative data on disabled older Americans
Source: Springer Nature journal article supplement (doi:10.1186/s12913-015-0978-x), 2015-07-30
Supplement: MOESM1 [file 9757532]

**Additional File 1. Odds Ratios From Logistic Regression Models Explaining Home Care Receipt by Payer (With Multiple Imputations (5) for Family Income and Home Assets)**

|                            | All Sources [A] |             | Public Program Only |              | Medicaid [C]               |              | Personal Only [D] |             | Public & Personal [E] |              |
|----------------------------|-----------------|-------------|---------------------|--------------|----------------------------|--------------|-------------------|-------------|-----------------------|--------------|
|                            | Odds Ratio      | (95% CI)    | Odds Ratio          | (95% CI)     | Odds Ratio                 | (95% CI)     | Odds Ratio        | (95% CI)    | Odds Ratio            | (95% CI)     |
| <b>Need for Caregiving</b> |                 |             |                     |              |                            |              |                   |             |                       |              |
| No. of ADL's               |                 |             |                     |              |                            |              |                   |             |                       |              |
| 1-2                        | 1.11            | (0.96-1.29) | 2.54 **             | (1.51-4.29)  | 1.44                       | (0.91-2.26)  | 0.96              | (0.82-1.13) | 1.60                  | (0.99-2.57)  |
| 3-4                        | 1.88 **         | (1.60-2.21) | 5.05 **             | (2.99-8.54)  | 2.68 **                    | (1.68-4.25)  | 1.37 **           | (1.14-1.64) | 2.90 **               | (1.78-4.71)  |
| 5-6                        | 3.21 **         | (2.65-3.89) | 6.30 **             | (3.62-10.96) | 3.35 **                    | (2.01-5.58)  | 1.96 **           | (1.57-2.45) | 6.70 **               | (4.05-11.09) |
| No. of IADL's              |                 |             |                     |              |                            |              |                   |             |                       |              |
| 2-3                        | 2.37 **         | (2.02-2.78) | 2.46 **             | (1.41-4.29)  | 2.35 **                    | (1.35-4.12)  | 2.28 **           | (1.91-2.72) | 2.05 **               | (1.20-3.51)  |
| 4-5                        | 4.21 **         | (3.53-5.04) | 4.74 **             | (2.72-8.24)  | 5.69 **                    | (3.27-9.91)  | 3.56 **           | (2.91-4.35) | 3.21 **               | (1.87-5.52)  |
| 6-8                        | 5.85 **         | (4.82-7.11) | 5.99 **             | (3.39-10.58) | 9.46 **                    | (5.32-16.83) | 4.22 **           | (3.37-5.27) | 4.19 **               | (2.41-7.30)  |
| Age                        | 1.02 **         | (1.01-1.03) | 0.99                | (0.98-1.01)  | 0.98 **                    | (0.96-0.99)  | 1.03 **           | (1.02-1.04) | 1.02 *                | (1.00-1.03)  |
| <b>Demographics</b>        |                 |             |                     |              |                            |              |                   |             |                       |              |
| Female                     | 0.95            | (0.85-1.06) | 0.86                | (0.67-1.11)  | 0.93                       | (0.71-1.22)  | 0.91              | (0.80-1.04) | 1.22                  | (0.94-1.57)  |
| Race                       |                 |             |                     |              |                            |              |                   |             |                       |              |
| African American           | 0.68 **         | (0.56-0.82) | 1.04                | (0.73-1.48)  | 1.67 **                    | (1.19-2.32)  | 0.43 **           | (0.33-0.56) | 0.72                  | (0.49-1.06)  |
| Other                      | 0.82            | (0.49-1.38) | 1.01                | (0.34-2.98)  | 0.88                       | (0.34-2.27)  | 0.93              | (0.50-1.74) | 0.28                  | (0.04-2.06)  |
| Hispanic                   | 1.00            | (0.78-1.29) | 0.70                | (0.38-1.27)  | 1.30                       | (0.82-2.08)  | 1.00              | (0.73-1.37) | 0.73                  | (0.41-1.31)  |
| <b>Economic Resources</b>  |                 |             |                     |              |                            |              |                   |             |                       |              |
| Education                  |                 |             |                     |              |                            |              |                   |             |                       |              |
| High school grad           | 1.42 **         | (1.27-1.60) | 0.97                | (0.75-1.27)  | 0.55 **                    | (0.41-0.76)  | 1.76 **           | (1.55-2.01) | 1.13                  | (0.86-1.47)  |
| College degree             | 2.10 **         | (1.73-2.55) | 0.97                | (0.57-1.64)  | 0.13 **                    | (0.04-0.42)  | 2.71 **           | (2.22-3.32) | 1.94 **               | (1.27-2.98)  |
| Family income              |                 |             |                     |              |                            |              |                   |             |                       |              |
| 15,000-29,999              | 1.07            | (0.92-1.24) | 0.76                | (0.56-1.03)  | 0.32 **                    | (0.20-0.52)  | 1.55 **           | (1.32-1.83) | 0.67 *                | (0.48-0.94)  |
| 30,000-49,999 <sup>a</sup> | 1.08            | (0.87-1.33) | 0.51                | (0.25-1.03)  | 0.27 **                    | (0.11-0.66)  | 1.61 **           | (1.29-2.02) | 0.59                  | (0.33-1.07)  |
| 50,000-74,999              | 1.25            | (0.91-1.70) | 0.63                | (0.26-1.52)  | (var omitted) <sup>a</sup> |              | 1.98 **           | (1.37-2.87) | 0.57                  | (0.28-1.15)  |
| 75,000+                    | 1.82 **         | (1.29-2.57) | 0.44                | (0.08-2.46)  | (var omitted) <sup>a</sup> |              | 2.89 **           | (2.01-4.16) | 0.40                  | (0.08-1.91)  |
| Home assets                |                 |             |                     |              |                            |              |                   |             |                       |              |
| < 150,000                  | 0.74 **         | (0.64-0.86) | 1.06                | (0.79-1.43)  | 0.48 **                    | (0.33-0.70)  | 0.84              | (0.69-1.04) | 0.60 **               | (0.44-0.81)  |
| ≥ 150,000                  | 0.79            | (0.60-1.05) | 0.87                | (0.53-1.43)  | 0.23 **                    | (0.09-0.63)  | 0.96              | (0.71-1.29) | 0.74                  | (0.45-1.21)  |
| <b>Year</b>                |                 |             |                     |              |                            |              |                   |             |                       |              |
| 1994                       | 1.08            | (0.94-1.23) | 3.39 **             | (2.46-4.66)  | 0.94                       | (0.67-1.32)  | 1.08              | (0.93-1.26) | 0.32 **               | (0.23-0.43)  |
| 1999                       | 0.53 **         | (0.46-0.62) | 1.90 **             | (1.32-2.75)  | 1.00                       | (0.70-1.42)  | 0.45 **           | (0.38-0.54) | 0.38 **               | (0.27-0.52)  |
| 2004                       | 0.36 **         | (0.31-0.42) | 0.85                | (0.55-1.31)  | 1.00                       | (0.69-1.45)  | 0.33 **           | (0.27-0.40) | 0.17 **               | (0.11-0.26)  |
| <b>Informal Resources</b>  |                 |             |                     |              |                            |              |                   |             |                       |              |
| Informal Care Hours        |                 |             |                     |              |                            |              |                   |             |                       |              |
| 0                          | 4.35 **         | (3.67-5.15) | 1.28                | (0.92-1.79)  | 3.58 **                    | (2.45-5.22)  | 5.18 **           | (4.20-6.38) | 1.24                  | (0.88-1.75)  |
| 1-8                        | 2.51 **         | (2.11-2.98) | 1.14                | (0.81-1.62)  | 2.25 **                    | (1.51-3.37)  | 3.06 **           | (2.47-3.79) | 1.51 *                | (1.07-2.13)  |
| 9-24                       | 1.34 **         | (1.11-1.60) | 1.00                | (0.71-1.43)  | 1.18                       | (0.74-1.87)  | 1.60 **           | (1.27-2.02) | 1.00                  | (0.70-1.44)  |
| Marital Status             |                 |             |                     |              |                            |              |                   |             |                       |              |
| Single                     | 1.13            | (0.86-1.48) | 0.67                | (0.36-1.24)  | 1.35                       | (0.70-2.60)  | 1.39 *            | (1.02-1.90) | 0.77                  | (0.42-1.38)  |
| Widowed                    | 1.53 **         | (1.34-1.75) | 0.93                | (0.69-1.27)  | 1.37                       | (0.93-2.01)  | 1.75 **           | (1.50-2.05) | 0.94                  | (0.69-1.27)  |
| Divorced                   | 1.59 **         | (1.28-1.97) | 1.23                | (0.78-1.95)  | 2.25 **                    | (1.40-3.62)  | 1.55 **           | (1.20-2.00) | 0.76                  | (0.45-1.30)  |
| Number of Children         |                 |             |                     |              |                            |              |                   |             |                       |              |
| 1                          | 0.71 **         | (0.60-0.85) | 0.53 **             | (0.36-0.78)  | 0.63 *                     | (0.41-0.97)  | 0.82 *            | (0.67-0.99) | 0.88                  | (0.61-1.28)  |
| 2                          | 0.70 **         | (0.59-0.82) | 0.52 **             | (0.36-0.75)  | 0.58 *                     | (0.38-0.89)  | 0.87              | (0.72-1.04) | 0.59 **               | (0.40-0.86)  |
| 3                          | 0.64 **         | (0.54-0.77) | 0.55 **             | (0.37-0.82)  | 0.79                       | (0.51-1.22)  | 0.70 **           | (0.57-0.86) | 0.72                  | (0.48-1.07)  |
| 4+                         | 0.62 **         | (0.53-0.74) | 0.58 **             | (0.41-0.82)  | 1.06                       | (0.73-1.54)  | 0.60 **           | (0.49-0.74) | 0.70                  | (0.48-1.02)  |

Notes: NLTCS, 1989-2004 (N = 12,956). \*p<.05, \*\*p<.01. Models include state fixed effects.

<sup>a</sup>Family income was topcoded at \$30,000+ in the Medicaid model due to the very small number of respondents with incomes over \$30,000 receiving services financed by Medicaid. Therefore, the second income dummy variable gives the difference in the outcome between those with incomes over \$30,000 and those in the lowest income category.
