# Supplementary material for: Who pays for home care? A study of nationally representative data on disabled older Americans
Source: Springer Nature journal article supplement (doi:10.1186/s12913-015-0978-x), 2015-07-30
Supplement: MOESM2 [file 9757532]

**Additional File 2. OLS Regression Models Explaining Log Hours of Home Care by Payer (With Multiple Imputations (5) for Family Income and Home Assets)**

|                            | All Sources [A] |       | Public Program Only |       |                            |       | Personal Only [D] |       | Public & Personal [E] |        |
|----------------------------|-----------------|-------|---------------------|-------|----------------------------|-------|-------------------|-------|-----------------------|--------|
|                            | Coef.           | S.E.  | Coef.               | S.E.  | Coef.                      | S.E.  | Coef.             | S.E.  | Coef.                 | S.E.   |
| <b>Need for Caregiving</b> |                 |       |                     |       |                            |       |                   |       |                       |        |
| No. of ADL's               |                 |       |                     |       |                            |       |                   |       |                       |        |
| 1-2                        | .02             | (.09) | .43                 | (.38) | .61 *                      | (.28) | -.04              | (.10) | -.72                  | (.41)  |
| 3-4                        | .37 **          | (.10) | .44                 | (.38) | .77 **                     | (.29) | .24 *             | (.11) | -.27                  | (.40)  |
| 5-6                        | .95 **          | (.11) | .72                 | (.39) | .77 *                      | (.32) | 1.11 **           | (.13) | .19                   | (.41)  |
| No. of IADL's              |                 |       |                     |       |                            |       |                   |       |                       |        |
| 2-3                        | .23 *           | (.10) | -.20                | (.39) | .06                        | (.33) | .28 *             | (.12) | .09                   | (.50)  |
| 4-5                        | .56 **          | (.11) | .15                 | (.39) | .03                        | (.33) | .49 **            | (.13) | .46                   | (.48)  |
| 6-8                        | 1.12 **         | (.12) | .29                 | (.40) | .54                        | (.35) | 1.22 **           | (.14) | .77                   | (.47)  |
| Age                        | .01 *           | (.00) | -.01                | (.01) | .01                        | (.01) | .01 **            | (.00) | .00                   | (.01)  |
| <b>Demographics</b>        |                 |       |                     |       |                            |       |                   |       |                       |        |
| Female                     | .04             | (.06) | -.02                | (.15) | .11                        | (.16) | .04               | (.07) | -.03                  | (.20)  |
| Race                       |                 |       |                     |       |                            |       |                   |       |                       |        |
| African American           | .06             | (.10) | .69 **              | (.21) | .09                        | (.20) | -.31              | (.16) | .12                   | (.29)  |
| Other                      | -.29            | (.30) | -.59                | (.67) | .12                        | (.58) | -.05              | (.39) | -1.41                 | (1.54) |
| Hispanic                   | .42 **          | (.13) | .95 *               | (.37) | .00                        | (.26) | .40 *             | (.18) | .51                   | (.48)  |
| <b>Economic Resources</b>  |                 |       |                     |       |                            |       |                   |       |                       |        |
| Education                  |                 |       |                     |       |                            |       |                   |       |                       |        |
| High school grad           | .03             | (.06) | .09                 | (.16) | .04                        | (.18) | .05               | (.08) | -.22                  | (.22)  |
| College degree             | .14             | (.10) | .05                 | (.39) | .43                        | (.88) | .17               | (.11) | -.28                  | (.36)  |
| Family income              |                 |       |                     |       |                            |       |                   |       |                       |        |
| 15,000-29,999              | .01             | (.08) | -.12                | (.21) | .41                        | (.28) | .04               | (.09) | .06                   | (.26)  |
| 30,000-49,999 <sup>a</sup> | .08             | (.12) | .02                 | (.45) | -.29                       | (.70) | .07               | (.14) | .13                   | (.45)  |
| 50,000-74,999              | .02             | (.18) | .03                 | (.55) | (var omitted) <sup>a</sup> |       | -.09              | (.17) | .62                   | (.59)  |
| 75,000+                    | .58 **          | (.19) | -.30                | (.89) | (var omitted) <sup>a</sup> |       | .61 **            | (.19) | .19                   | (1.18) |
| Home assets                |                 |       |                     |       |                            |       |                   |       |                       |        |
| < 150,000                  | -.03            | (.06) | .00                 | (.20) | -.10                       | (.19) | -.03              | (.09) | -.01                  | (.22)  |
| ≥ 150,000                  | .12             | (.10) | .15                 | (.38) | -.33                       | (.55) | .17               | (.13) | .03                   | (.34)  |
| <b>Year</b>                |                 |       |                     |       |                            |       |                   |       |                       |        |
| 1994                       | .01             | (.07) | .19                 | (.20) | -.05                       | (.19) | -.07              | (.09) | .37                   | (.25)  |
| 1999                       | -.09            | (.08) | .03                 | (.23) | -.30                       | (.20) | -.12              | (.10) | .36                   | (.25)  |
| 2004                       | -.16            | (.08) | .28                 | (.29) | -.30                       | (.21) | -.28 **           | (.10) | .68 *                 | (.34)  |
| <b>Informal Resources</b>  |                 |       |                     |       |                            |       |                   |       |                       |        |
| Informal Care Hours        |                 |       |                     |       |                            |       |                   |       |                       |        |
| 9-24                       | .37 **          | (.10) | .12                 | (.23) | -.03                       | (.28) | .36 **            | (.13) | .24                   | (.29)  |
| 1-8                        | .58 **          | (.09) | .37                 | (.24) | .13                        | (.23) | .39 **            | (.12) | .45                   | (.28)  |
| 0                          | .76 **          | (.09) | .64 **              | (.22) | .65 **                     | (.23) | .59 **            | (.12) | .65 *                 | (.29)  |
| Marital Status             |                 |       |                     |       |                            |       |                   |       |                       |        |
| Single                     | .07             | (.14) | .01                 | (.38) | .49                        | (.38) | -.02              | (.16) | -.23                  | (.45)  |
| Widowed                    | .16 *           | (.07) | -.21                | (.21) | .32                        | (.23) | .20 *             | (.09) | .06                   | (.24)  |
| Divorced                   | .04             | (.12) | .02                 | (.29) | .10                        | (.30) | -.07              | (.15) | -.12                  | (.45)  |
| Number of Children         |                 |       |                     |       |                            |       |                   |       |                       |        |
| 1                          | -.10            | (.09) | .55 *               | (.24) | -.01                       | (.27) | -.18              | (.11) | .07                   | (.30)  |
| 2                          | -.04            | (.08) | .22                 | (.22) | .64 **                     | (.24) | -.13              | (.10) | -.24                  | (.30)  |
| 3                          | .00             | (.09) | .44                 | (.25) | .06                        | (.24) | -.07              | (.12) | .29                   | (.33)  |
| 4+                         | -.06            | (.09) | .48 *               | (.23) | .10                        | (.21) | -.19              | (.11) | .16                   | (.30)  |

Notes: NLTCs, 1989-2004 (all sources model  $N = 2,428$ , Medicare only  $N = 335$ , Medicaid  $N = 313$ , personal only  $N = 1,621$ , public & personal  $N = 326$ ). \* $p < .05$ , \*\* $p < .01$ . Models include state fixed effects.

<sup>a</sup>Family income was topcoded at \$30,000+ in the Medicaid model due to the very small number of respondents with incomes over \$30,000 receiving services financed by Medicaid. Therefore, the second income dummy variable gives the difference in the outcome between those with incomes over \$30,000 and those in the lowest income category.
