# Supplementary material for: Who pays for home care? A study of nationally representative data on disabled older Americans
Source: Springer Nature journal article supplement (doi:10.1186/s12913-015-0978-x), 2015-07-30
Supplement: MOESM3 [file 9757532]

**Additional File 3. Descriptive Statistics for Home Care Services Use by Payer**

| Payer             | Receiving at Least One Hour |         | Conditional on Receiving at Least One Hour |        |      |      |          |
|-------------------|-----------------------------|---------|--------------------------------------------|--------|------|------|----------|
|                   | Number                      | Percent | Mean                                       | Median | Min. | Max. | Skewness |
| Any Payer         | 2428                        | 20.7    | 20                                         | 6      | 1    | 336  | 4.0      |
| Medicare Only     | 335                         | 2.9     | 11                                         | 4      | 1    | 108  | 3.4      |
| Medicaid          | 313                         | 2.7     | 19                                         | 12     | 1    | 168  | 2.7      |
| Personal Only     | 1,621                       | 13.8    | 20                                         | 5      | 1    | 336  | 4.0      |
| Public & Personal | 326                         | 2.8     | 19                                         | 5      | 1    | 288  | 3.6      |

Notes: NLTCS, 1989-2004 (N = 11,725).
