# Supplementary material for: Who pays for home care? A study of nationally representative data on disabled older Americans
Source: Springer Nature journal article supplement (doi:10.1186/s12913-015-0978-x), 2015-07-30

Additional File 4. Care Hours Received From Each Payer by Family Income

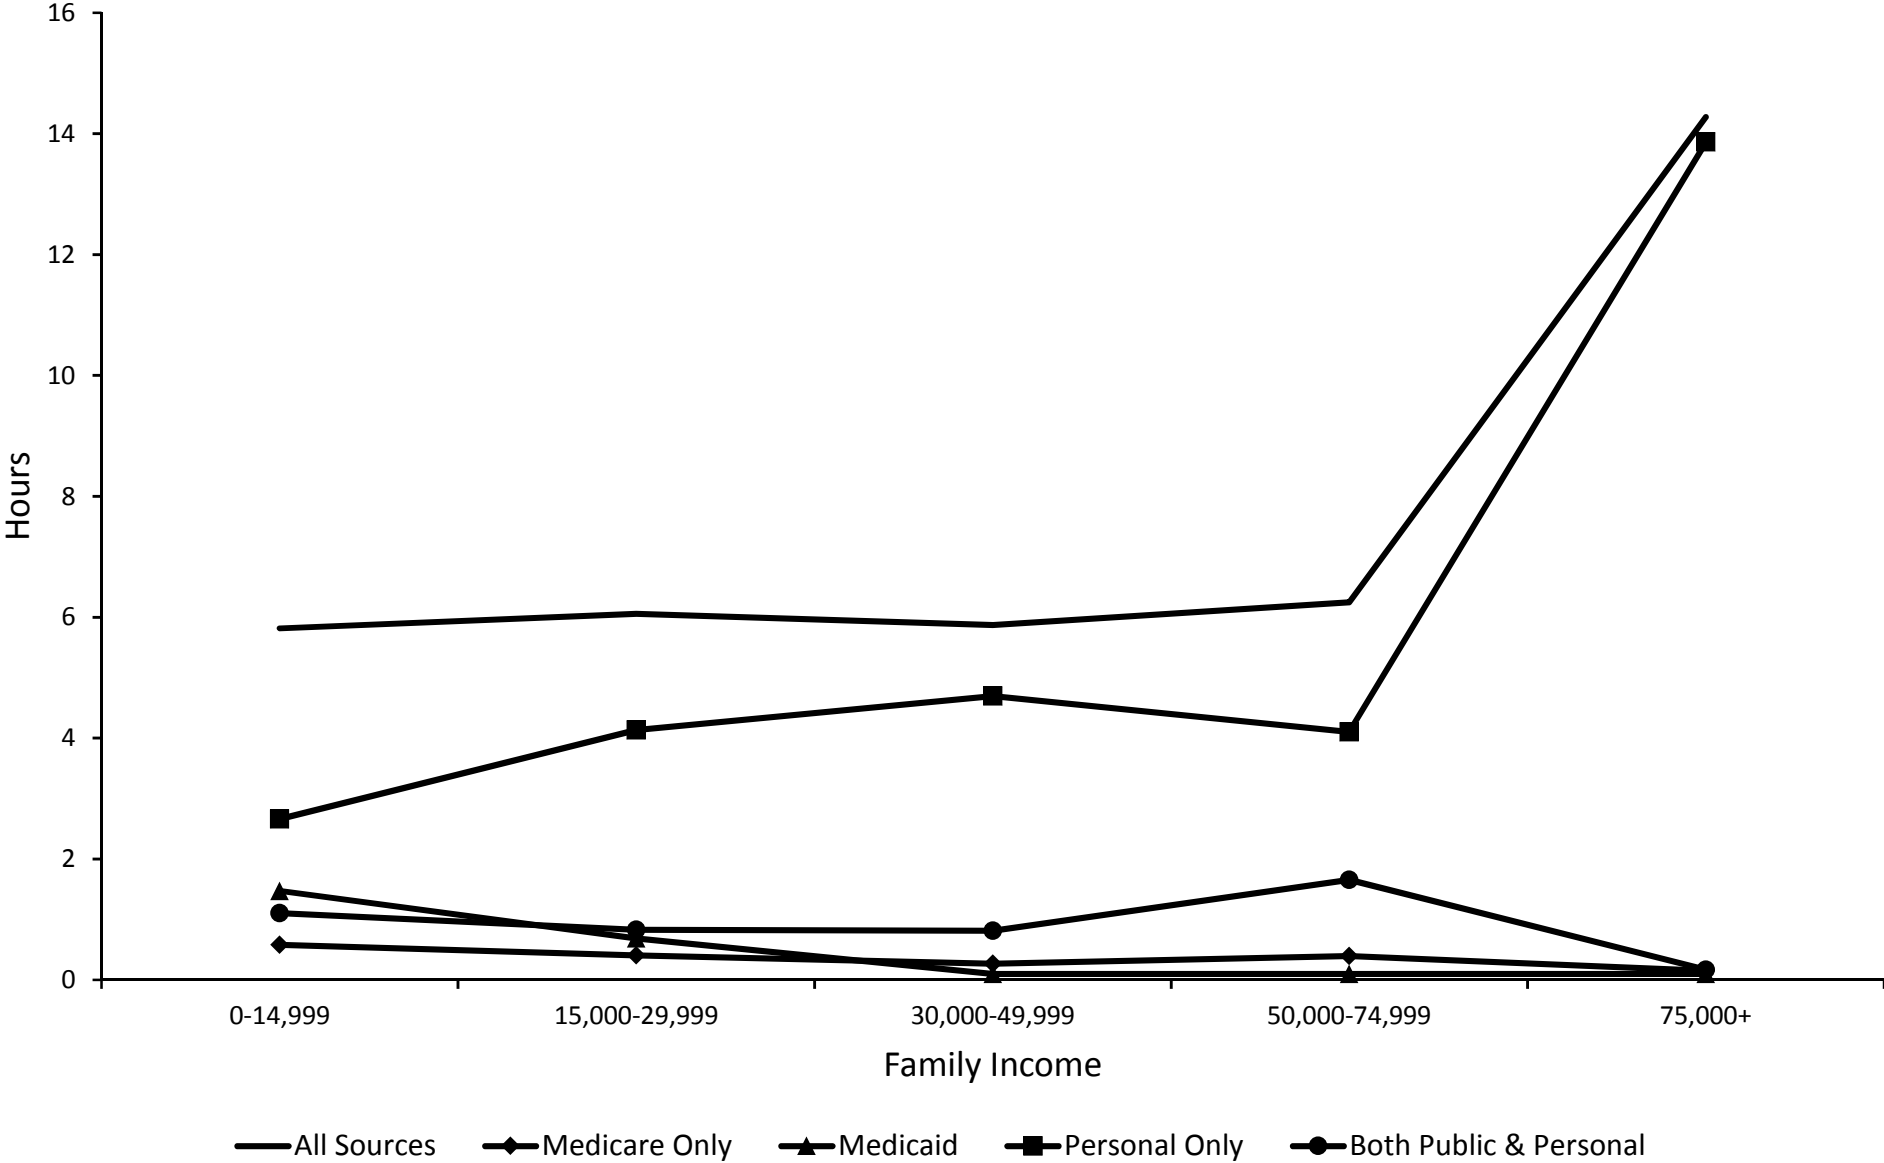

Supplement: MOESM4 [file 9757532]
