# Supplementary material for: Who pays for home care? A study of nationally representative data on disabled older Americans
Source: Springer Nature journal article supplement (doi:10.1186/s12913-015-0978-x), 2015-07-30
Supplement: MOESM5 [file 9757532]

Additional File 5. Care Hours Received From Each Payer by Number of ADL's

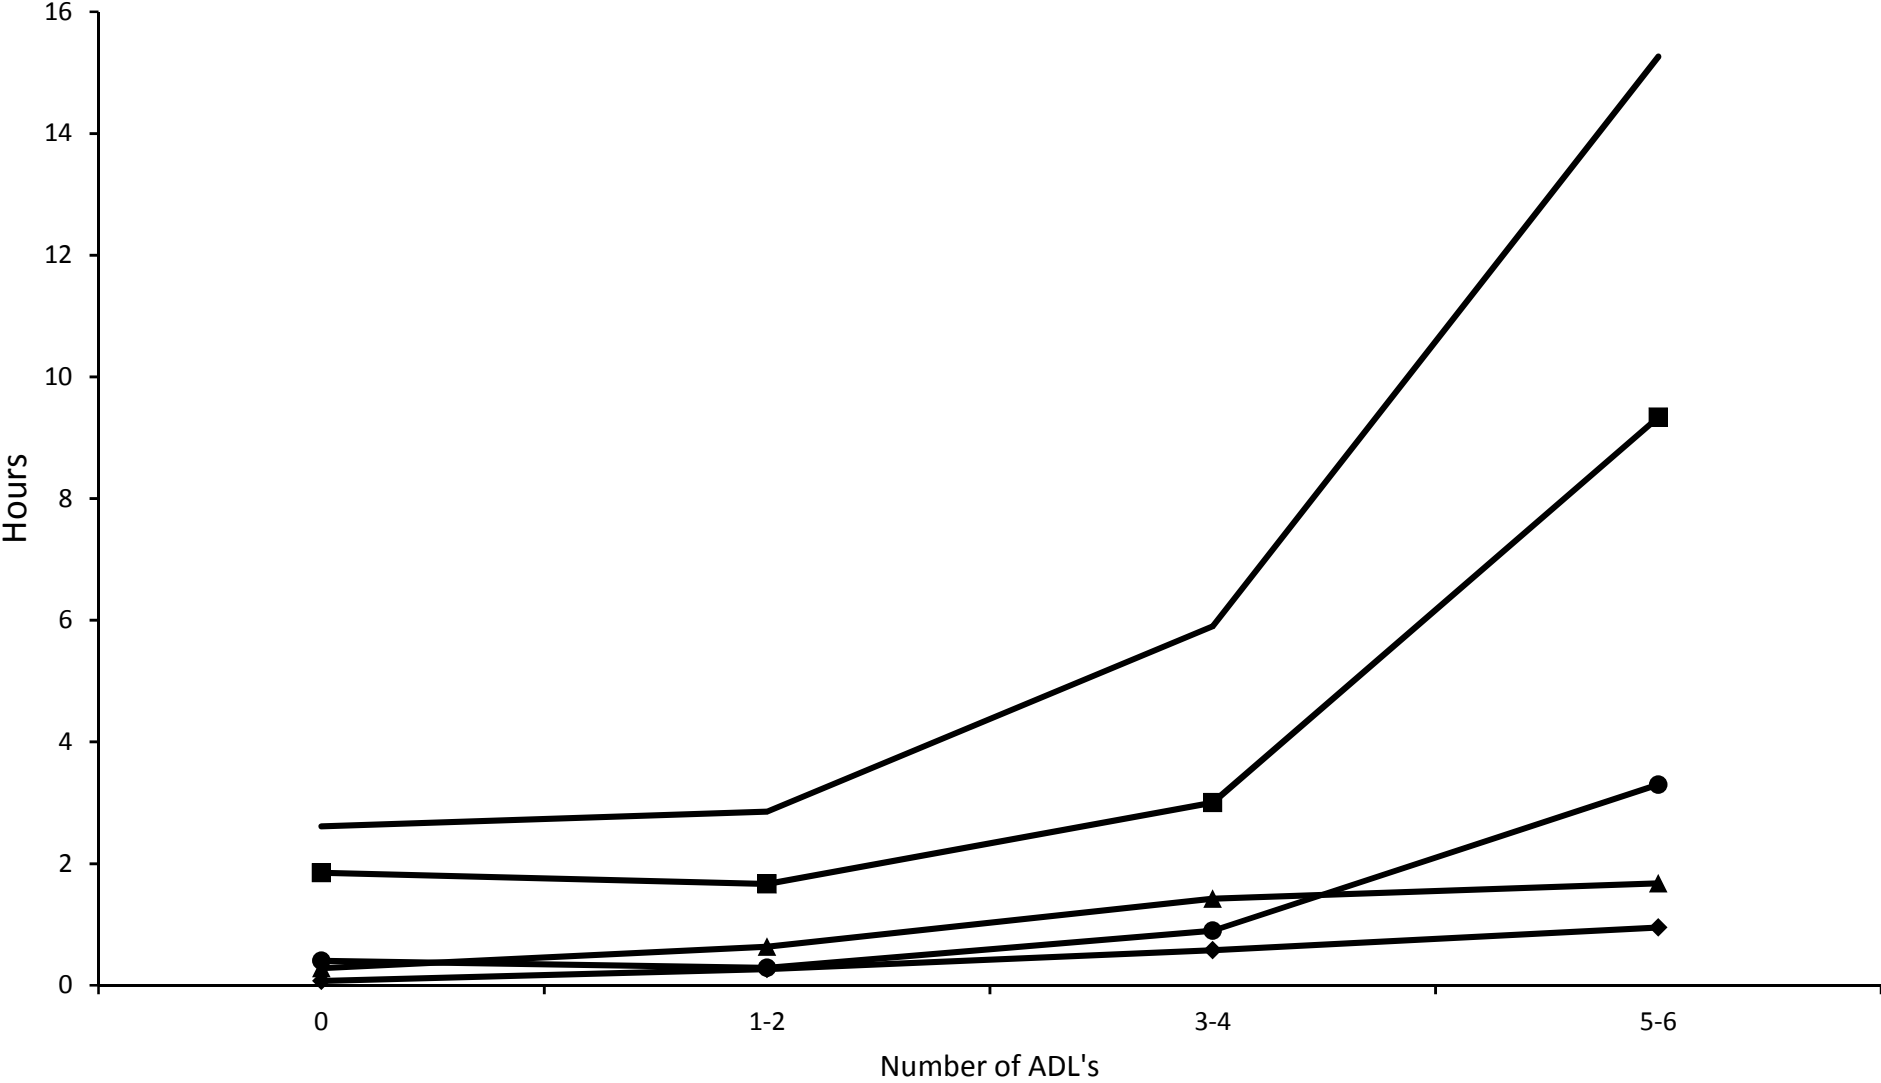

— All Sources    ◆ Medicare Only    ▲ Medicaid    ■ Personal Only    ● Both Public & Personal
