# Supplementary material for: Who pays for home care? A study of nationally representative data on disabled older Americans
Source: Springer Nature journal article supplement (doi:10.1186/s12913-015-0978-x), 2015-07-30
Supplement: MOESM6 [file 9757532]

**Additional File 6. Odds Ratios From Logistic Regression Models Explaining Home Care Receipt Paid for by Medicaid Alone**

|                                                 | Odds Ratio | (95% CI)       |
|-------------------------------------------------|------------|----------------|
| <b><i>Need for Caregiving</i></b>               |            |                |
| No. of ADL's                                    |            |                |
| 1-2                                             | 1.34       | (0.74 - 2.42)  |
| 3-4                                             | 2.26 **    | (1.27 - 4.01)  |
| 5-6                                             | 2.39 **    | (1.25 - 4.57)  |
| No. of IADL's                                   |            |                |
| 2-3                                             | 3.12 **    | (1.34 - 7.26)  |
| 4-5                                             | 6.38 **    | (2.73 - 14.92) |
| 6-8                                             | 12.00 **   | (5.18 - 27.81) |
| Age                                             | 0.99       | (0.96 - 1.01)  |
| <b><i>Basic Demographic Characteristics</i></b> |            |                |
| Female                                          | 0.93       | (0.65 - 1.34)  |
| Race                                            |            |                |
| African American                                | 1.71 *     | (1.11 - 2.63)  |
| Other                                           | 1.06       | (0.33 - 3.44)  |
| Hispanic                                        | 0.82       | (0.41 - 1.66)  |
| <b><i>Economic Resources</i></b>                |            |                |
| Education                                       |            |                |
| High school grad                                | 0.60 **    | (0.41 - 0.88)  |
| College degree                                  | 0.20 *     | (0.06 - 0.68)  |
| Family income                                   |            |                |
| 15,000-29,999                                   | 0.23 **    | (0.13 - 0.41)  |
| 30,000+                                         | 0.19 **    | (0.06 - 0.64)  |
| Family income missing                           | 0.32 **    | (0.20 - 0.52)  |
| Home assets                                     |            |                |
| Yes, home value missing                         | 0.56 **    | (0.37 - 0.86)  |
| Home value < 150,000                            | 0.38 **    | (0.24 - 0.59)  |
| Home value ≥ 150,000                            | 0.19 **    | (0.06 - 0.62)  |
| <b><i>Year</i></b>                              |            |                |
| 1994                                            | 1.07       | (0.68 - 1.68)  |
| 1999                                            | 1.06       | (0.65 - 1.71)  |
| 2004                                            | 0.91       | (0.57 - 1.47)  |
| <b><i>Informal Caregiving Resources</i></b>     |            |                |
| Hours of Informal Care                          |            |                |
| 0                                               | 4.27 **    | (2.55 - 7.15)  |
| 1-8                                             | 3.14 **    | (1.81 - 5.46)  |
| 9-24                                            | 1.31       | (0.69 - 2.48)  |
| Marital Status                                  |            |                |
| Single                                          | 1.10       | (0.49 - 2.49)  |
| Widowed                                         | 1.00       | (0.62 - 1.61)  |
| Divorced                                        | 1.85 *     | (1.07 - 3.21)  |
| Number of Children                              |            |                |
| 1                                               | 0.62       | (0.35 - 1.09)  |
| 2                                               | 0.60       | (0.35 - 1.01)  |
| 3                                               | 0.75       | (0.42 - 1.34)  |
| 4+                                              | 1.04       | (0.64 - 1.69)  |

Notes: NLTCs, 1989-2004 (N = 11,725). Model includes state fixed effects. \*p<.05, \*\*p<.01.
