# Supplementary material for: Who pays for home care? A study of nationally representative data on disabled older Americans
Source: Springer Nature journal article supplement (doi:10.1186/s12913-015-0978-x), 2015-07-30
Supplement: MOESM7 [file 9757532]

**Additional File 7. Odds Ratios From Logistic Regression Models Explaining Home Care Receipt Paid for by Family Members**

|                                          | Odds Ratio | (95% CI)       |
|------------------------------------------|------------|----------------|
| <b>Need for Caregiving</b>               |            |                |
| No. of ADL's                             |            |                |
| 1-2                                      | 2.56 **    | (1.33 - 4.90)  |
| 3-4                                      | 2.85 **    | (1.39 - 5.86)  |
| 5-6                                      | 5.09 **    | (2.44 - 10.61) |
| No. of IADL's                            |            |                |
| 2-3                                      | 1.26       | (0.70 - 2.27)  |
| 4-5                                      | 1.93 *     | (1.03 - 3.64)  |
| 6-8                                      | 3.76 **    | (1.98 - 7.14)  |
| Age                                      | 1.04 **    | (1.02 - 1.06)  |
| <b>Basic Demographic Characteristics</b> |            |                |
| Female                                   | 0.85       | (0.60 - 1.22)  |
| Race                                     |            |                |
| African American                         | 0.47 *     | (0.24 - 0.94)  |
| Other                                    | 0.90       | (0.18 - 4.40)  |
| Hispanic                                 | 0.82       | (0.39 - 1.75)  |
| <b>Economic Resources</b>                |            |                |
| Education                                |            |                |
| High school grad                         | 1.38       | (0.96 - 1.99)  |
| College degree                           | 2.20 **    | (1.32 - 3.66)  |
| Family income                            |            |                |
| 15,000-29,999                            | 0.96       | (0.59 - 1.55)  |
| 30,000-49,999                            | 0.89       | (0.42 - 1.88)  |
| 50,000-74,999                            | 1.82       | (0.88 - 3.74)  |
| 75,000+                                  | 2.64 *     | (1.16 - 6.04)  |
| Family income missing                    | 1.69 **    | (1.17 - 2.44)  |
| Home assets                              |            |                |
| Yes, home value missing                  | 0.67       | (0.43 - 1.05)  |
| Home value < 150,000                     | 0.56 **    | (0.37 - 0.83)  |
| Home value ≥ 150,000                     | 0.65       | (0.40 - 1.05)  |
| <b>Year</b>                              |            |                |
| 1994                                     | 0.42 **    | (0.27 - 0.65)  |
| 1999                                     | 0.34 **    | (0.21 - 0.55)  |
| 2004                                     | 0.41 **    | (0.27 - 0.63)  |
| <b>Informal Caregiving Resources</b>     |            |                |
| Hours of Informal Care                   |            |                |
| 0                                        | 1.40       | (0.88 - 2.23)  |
| 1-8                                      | 1.53       | (0.96 - 2.44)  |
| 9-24                                     | 0.86       | (0.50 - 1.47)  |
| Marital Status                           |            |                |
| Single                                   | 0.90       | (0.36 - 2.21)  |
| Widowed                                  | 1.03       | (0.68 - 1.58)  |
| Divorced                                 | 1.19       | (0.61 - 2.33)  |
| Number of Children                       |            |                |
| 1                                        | 0.82       | (0.46 - 1.46)  |
| 2                                        | 1.49       | (0.90 - 2.46)  |
| 3                                        | 1.29       | (0.74 - 2.22)  |
| 4+                                       | 1.16       | (0.68 - 1.98)  |

Notes: NLTCs, 1989-2004 ( $N = 11,725$ ). Model includes state fixed effects. \* $p < .05$ , \*\* $p < .01$ .
